# Supplementary material for: A Network Toxicology Approach for Mechanistic Modelling of Nanomaterial Hazard and Adverse Outcomes
Source: PubMed Central journal article supplement (PMC11348149; doi:10.1002/advs.202400389), 2024-06-25
Supplement: ADVS-11-2400389-s001.pdf [file ADVS-11-2400389-s001.pdf]

## Supporting Information

for *Adv. Sci.*, DOI 10.1002/adv.202400389

A Network Toxicology Approach for Mechanistic Modelling of Nanomaterial Hazard and Adverse Outcomes

*Giusy del Giudice, Angela Serra, Alisa Pavel, Marcella Torres Maia, Laura Aliisa Saarimäki, Michele Fratello, Antonio Federico, Harri Alenius, Bengt Fadeel and Dario Greco\**

## Supporting Information

### **A Network Toxicology Approach for Mechanistic Modelling of Nanomaterial Hazard and Adverse Outcomes**

*Giusy del Giudice , Angela Serra , Alisa Pavel , Marcella Torres Maia, Laura Aliisa  
Saarimäki, Michele Fratello , Antonio Federico , Harri Alenius , Bengt Fadeel ,  
Dario Greco.*

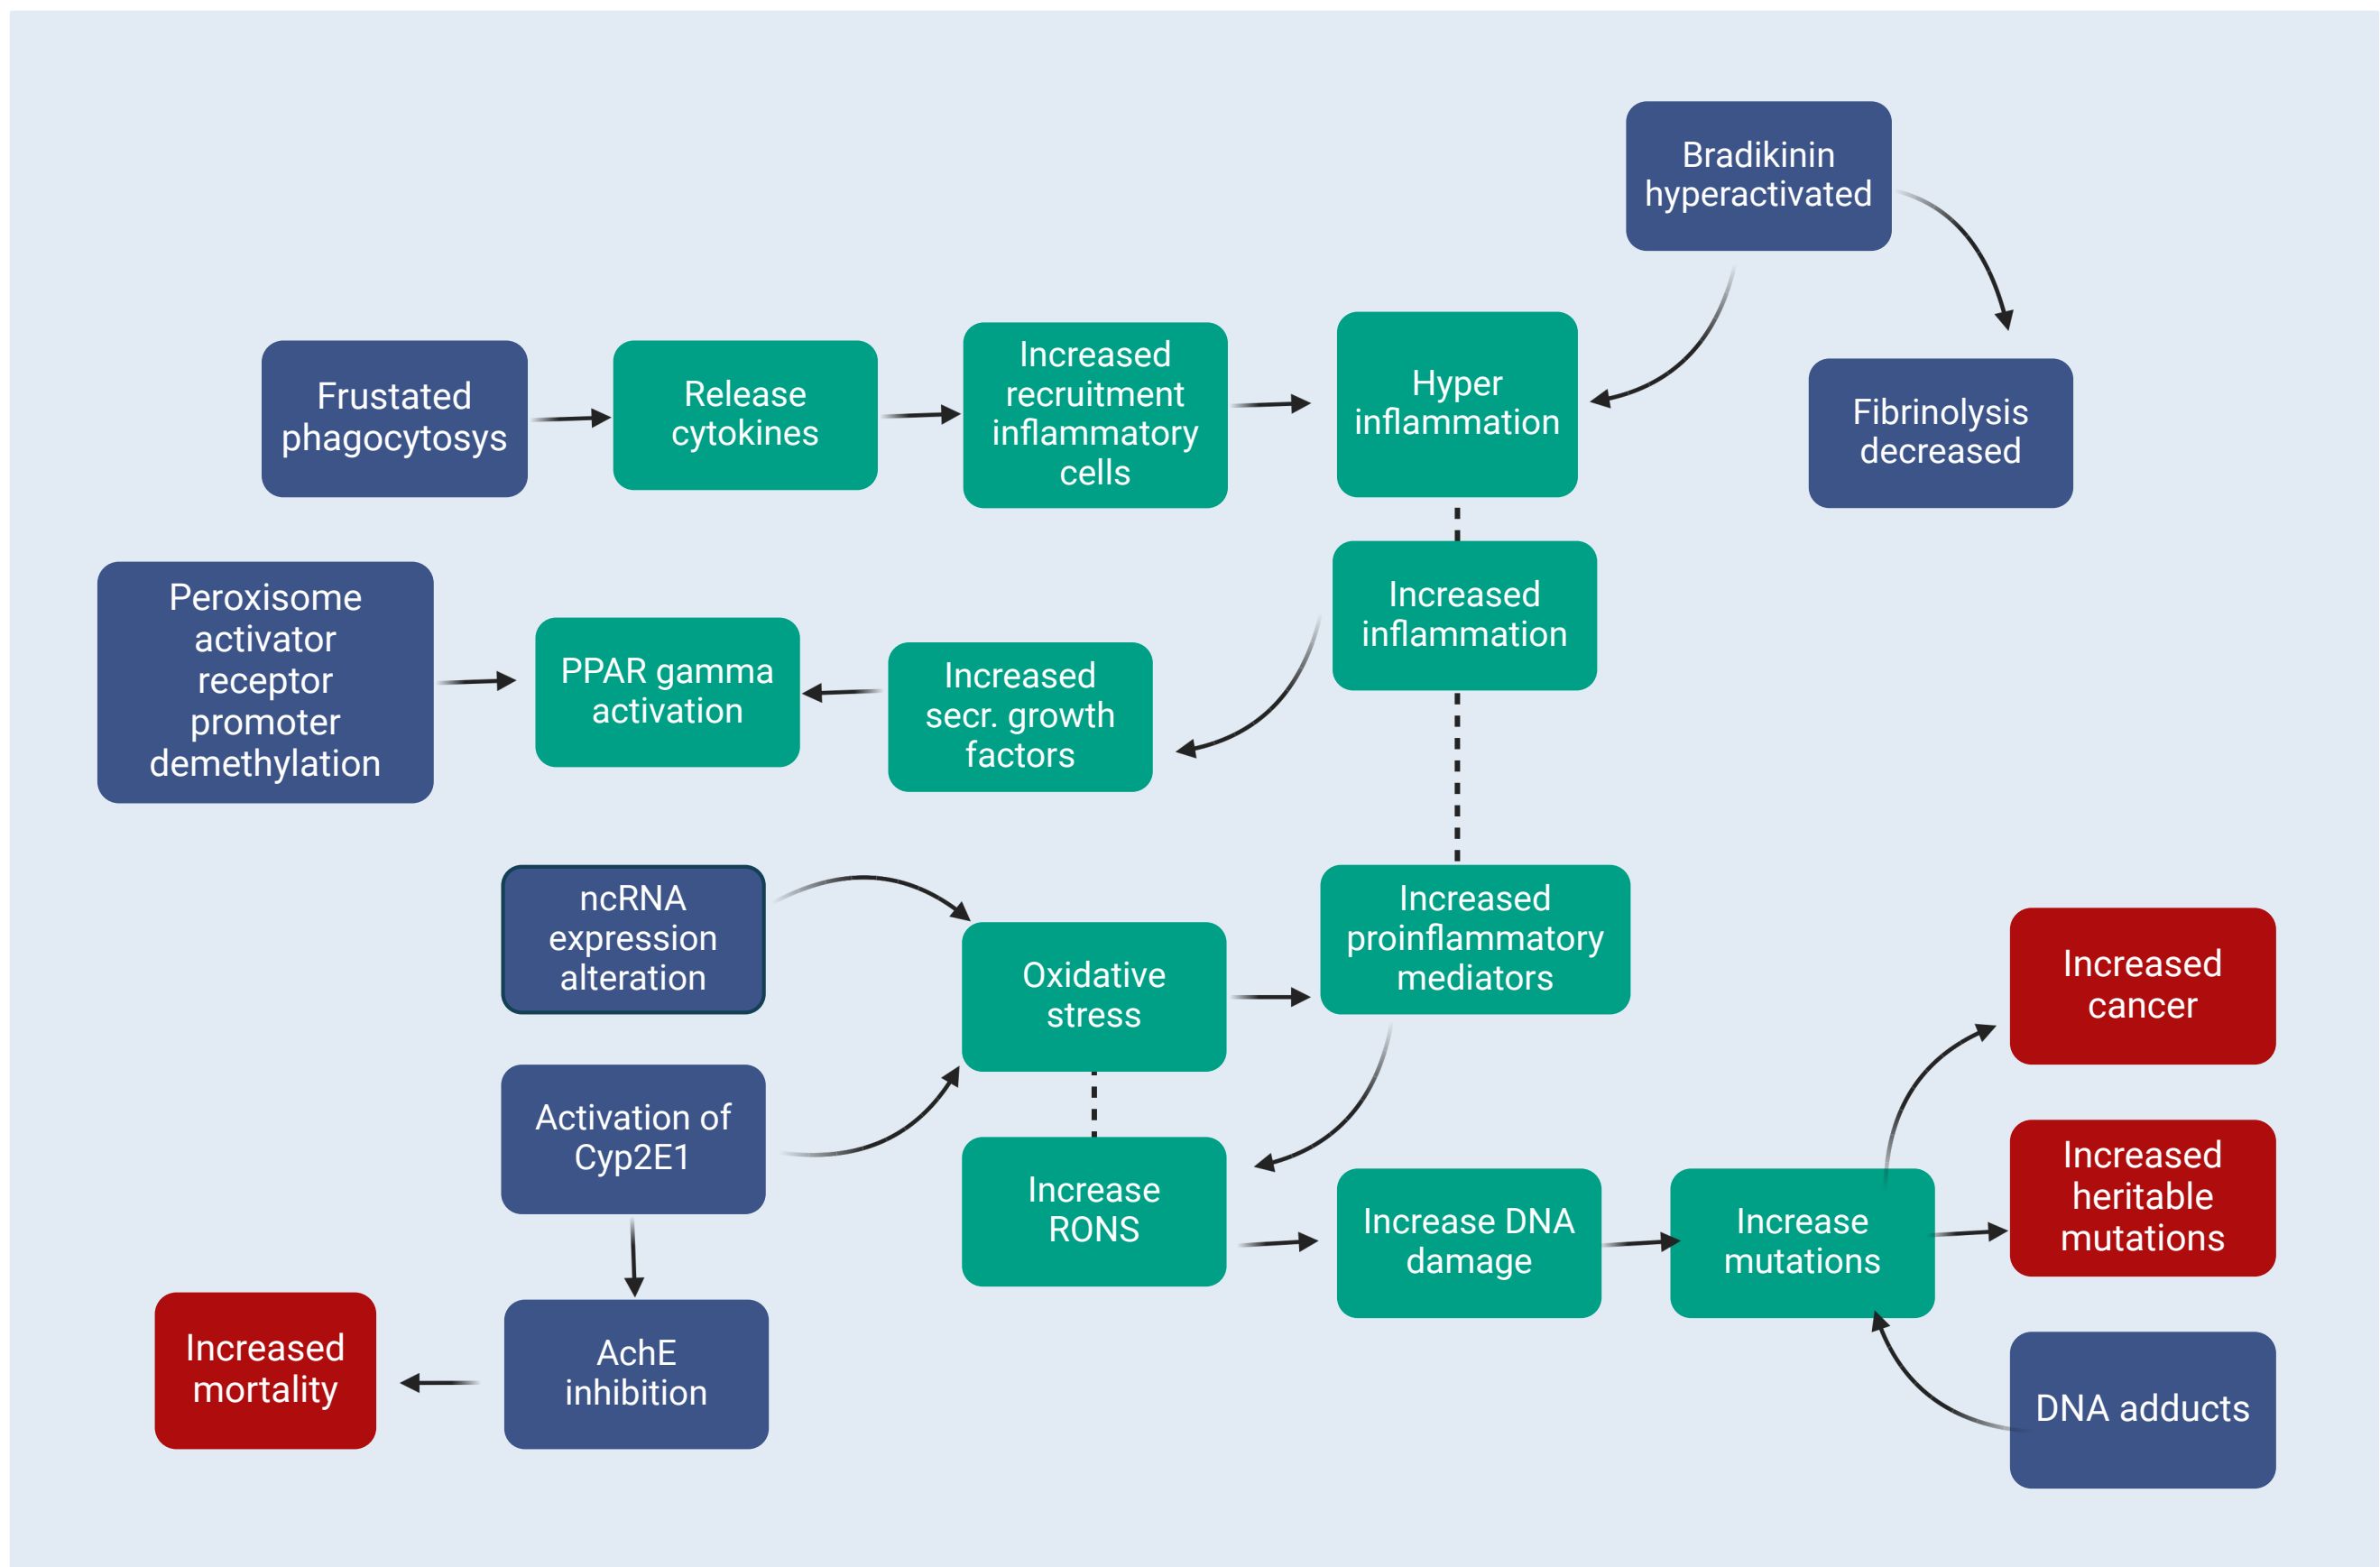

**Figure S1:** Reconstructed mechanism of response to MWCNT exposure.

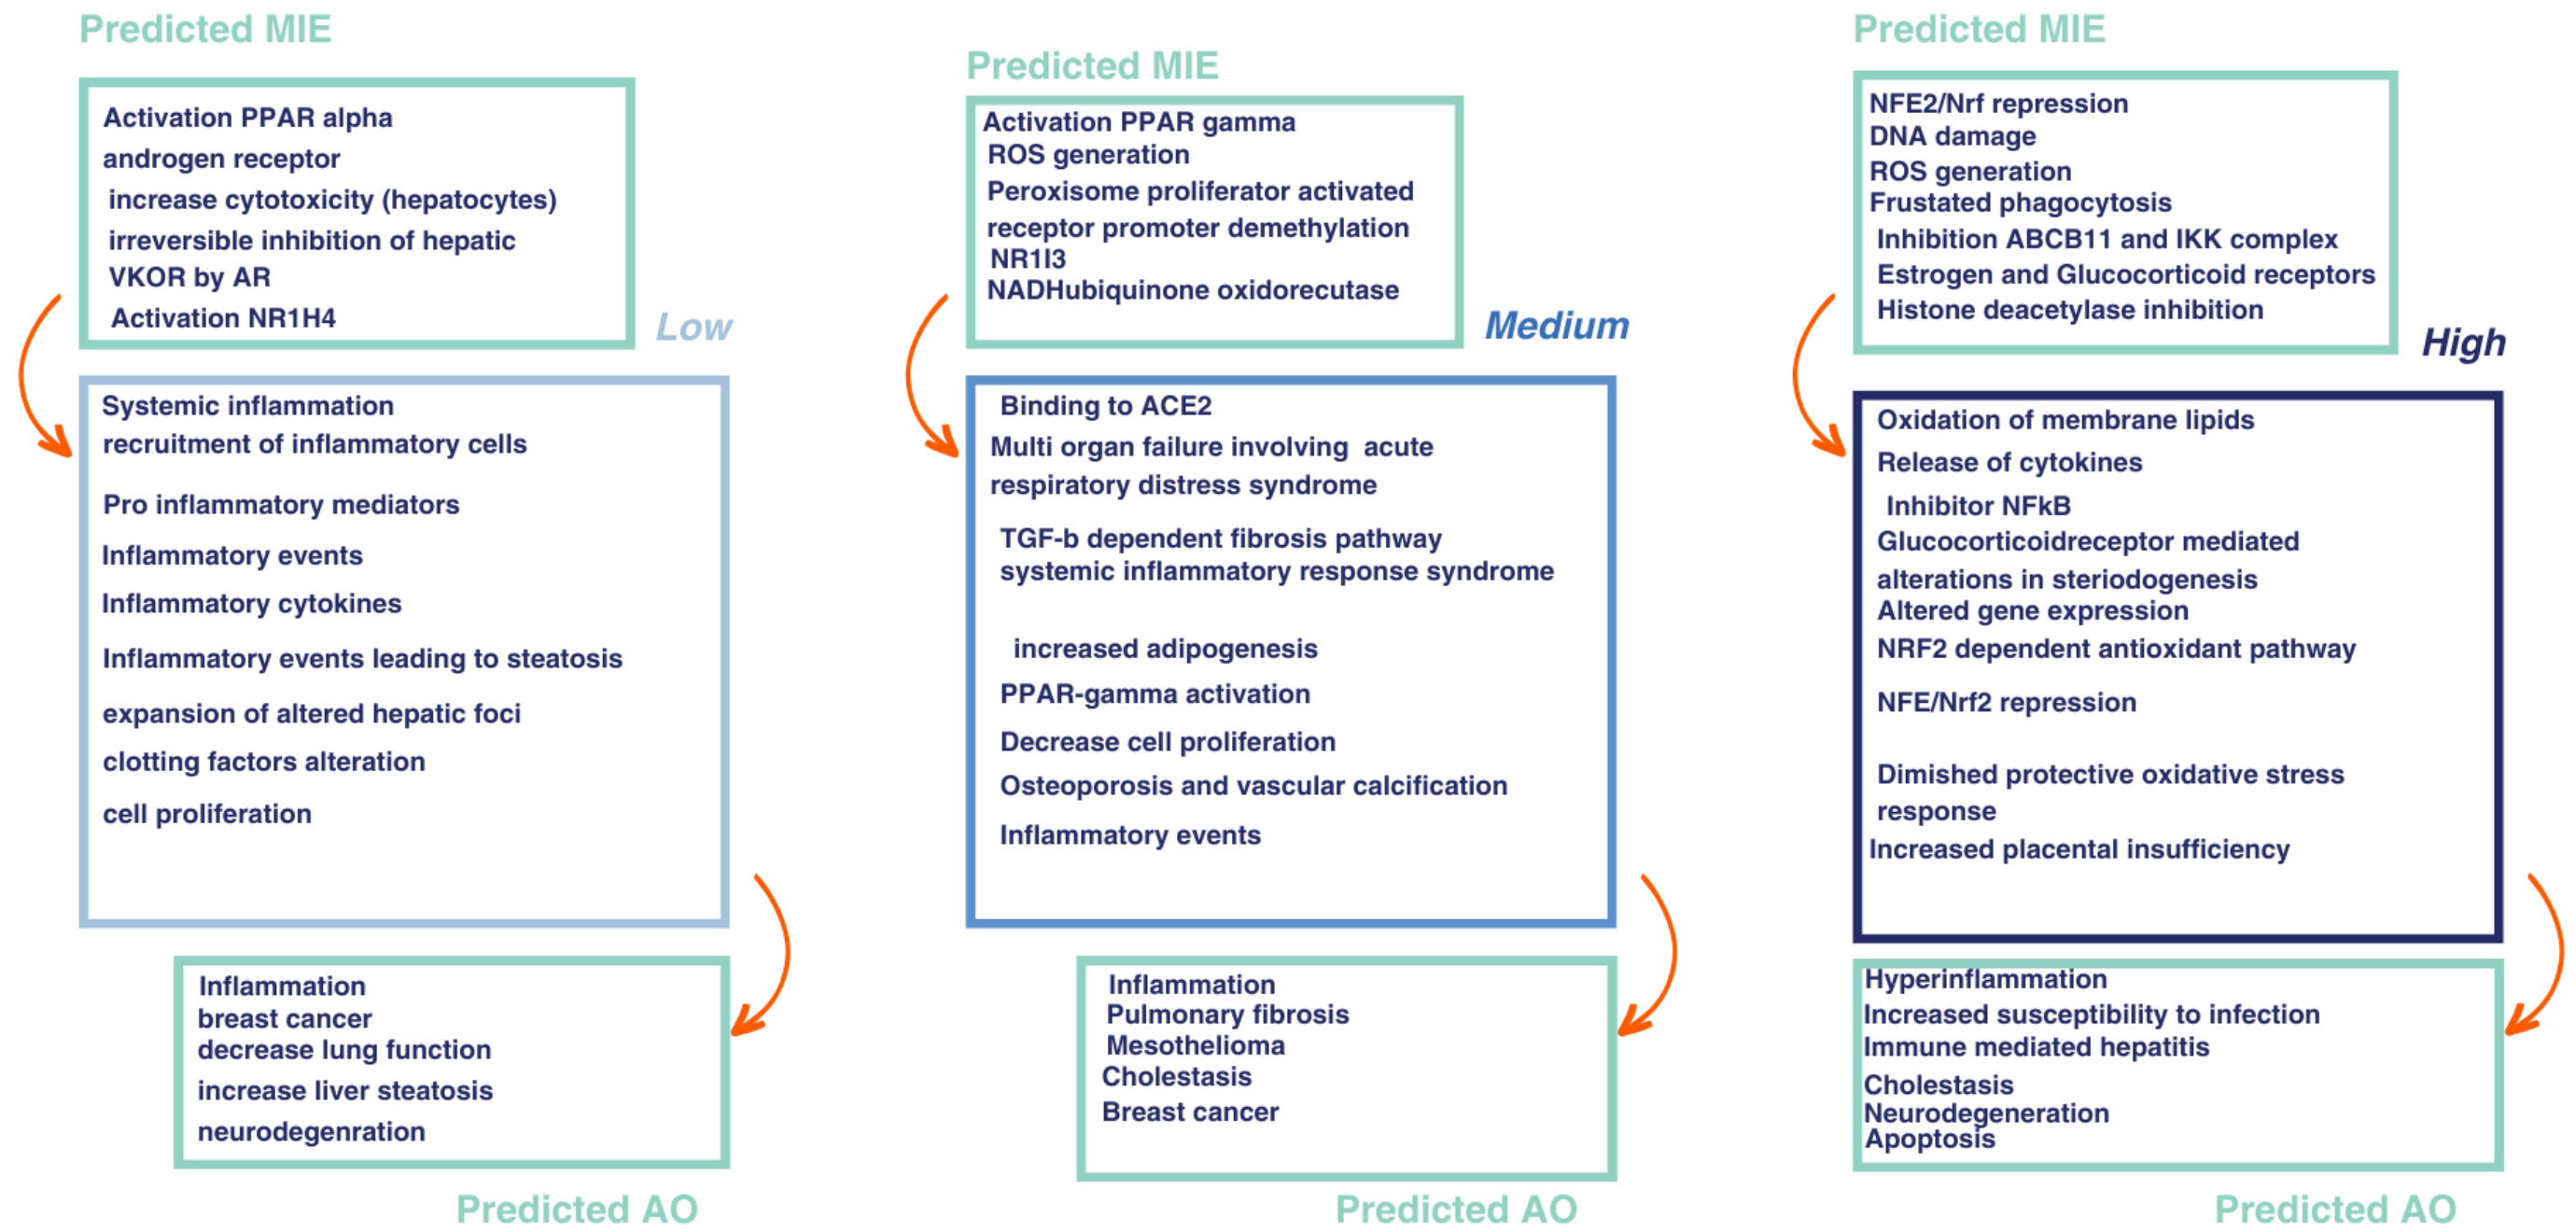

**Figure S2:** AOP-based reconstructed mechanism of materials inducing different levels of neutrophil infiltration, as described in Fortino et al. In this case, co-expression network representations of the exposures were used as the input of the framework.

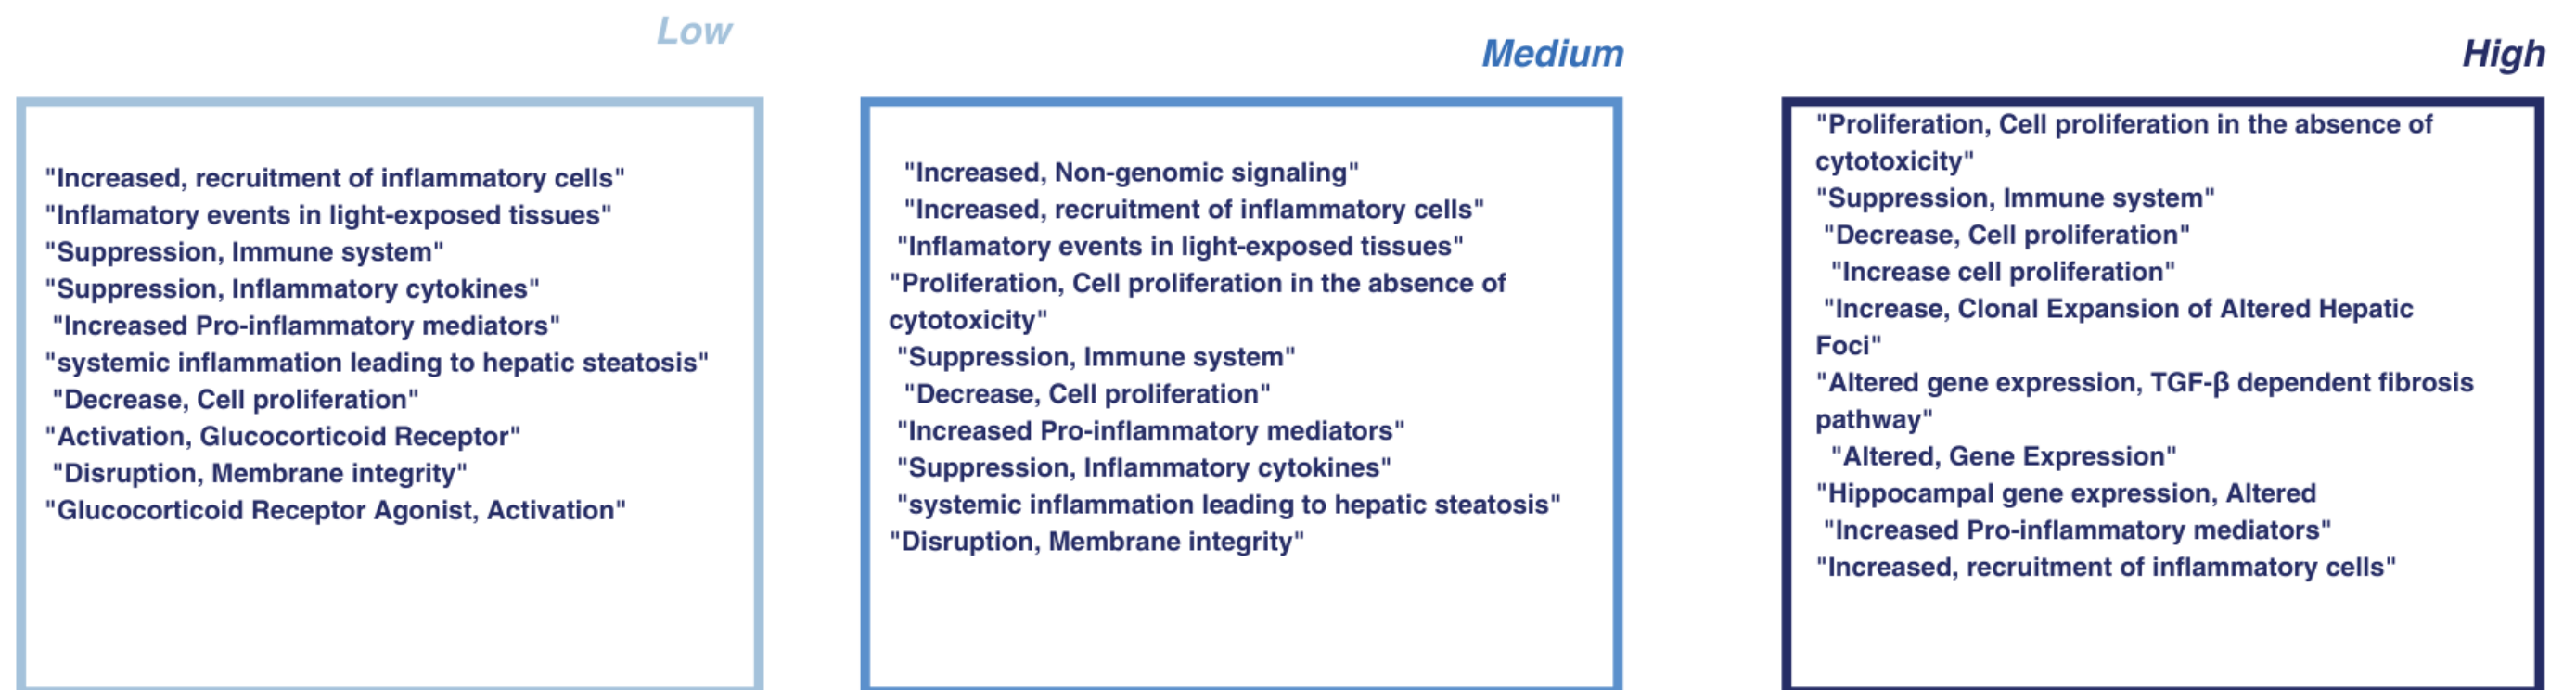

**Figure S3:** AOP-based reconstructed mechanism of materials inducing different levels of neutrophil infiltration, as described in Fortino et al. In this case, lists of differentially expressed genes of the exposures were used as the input of the framework.

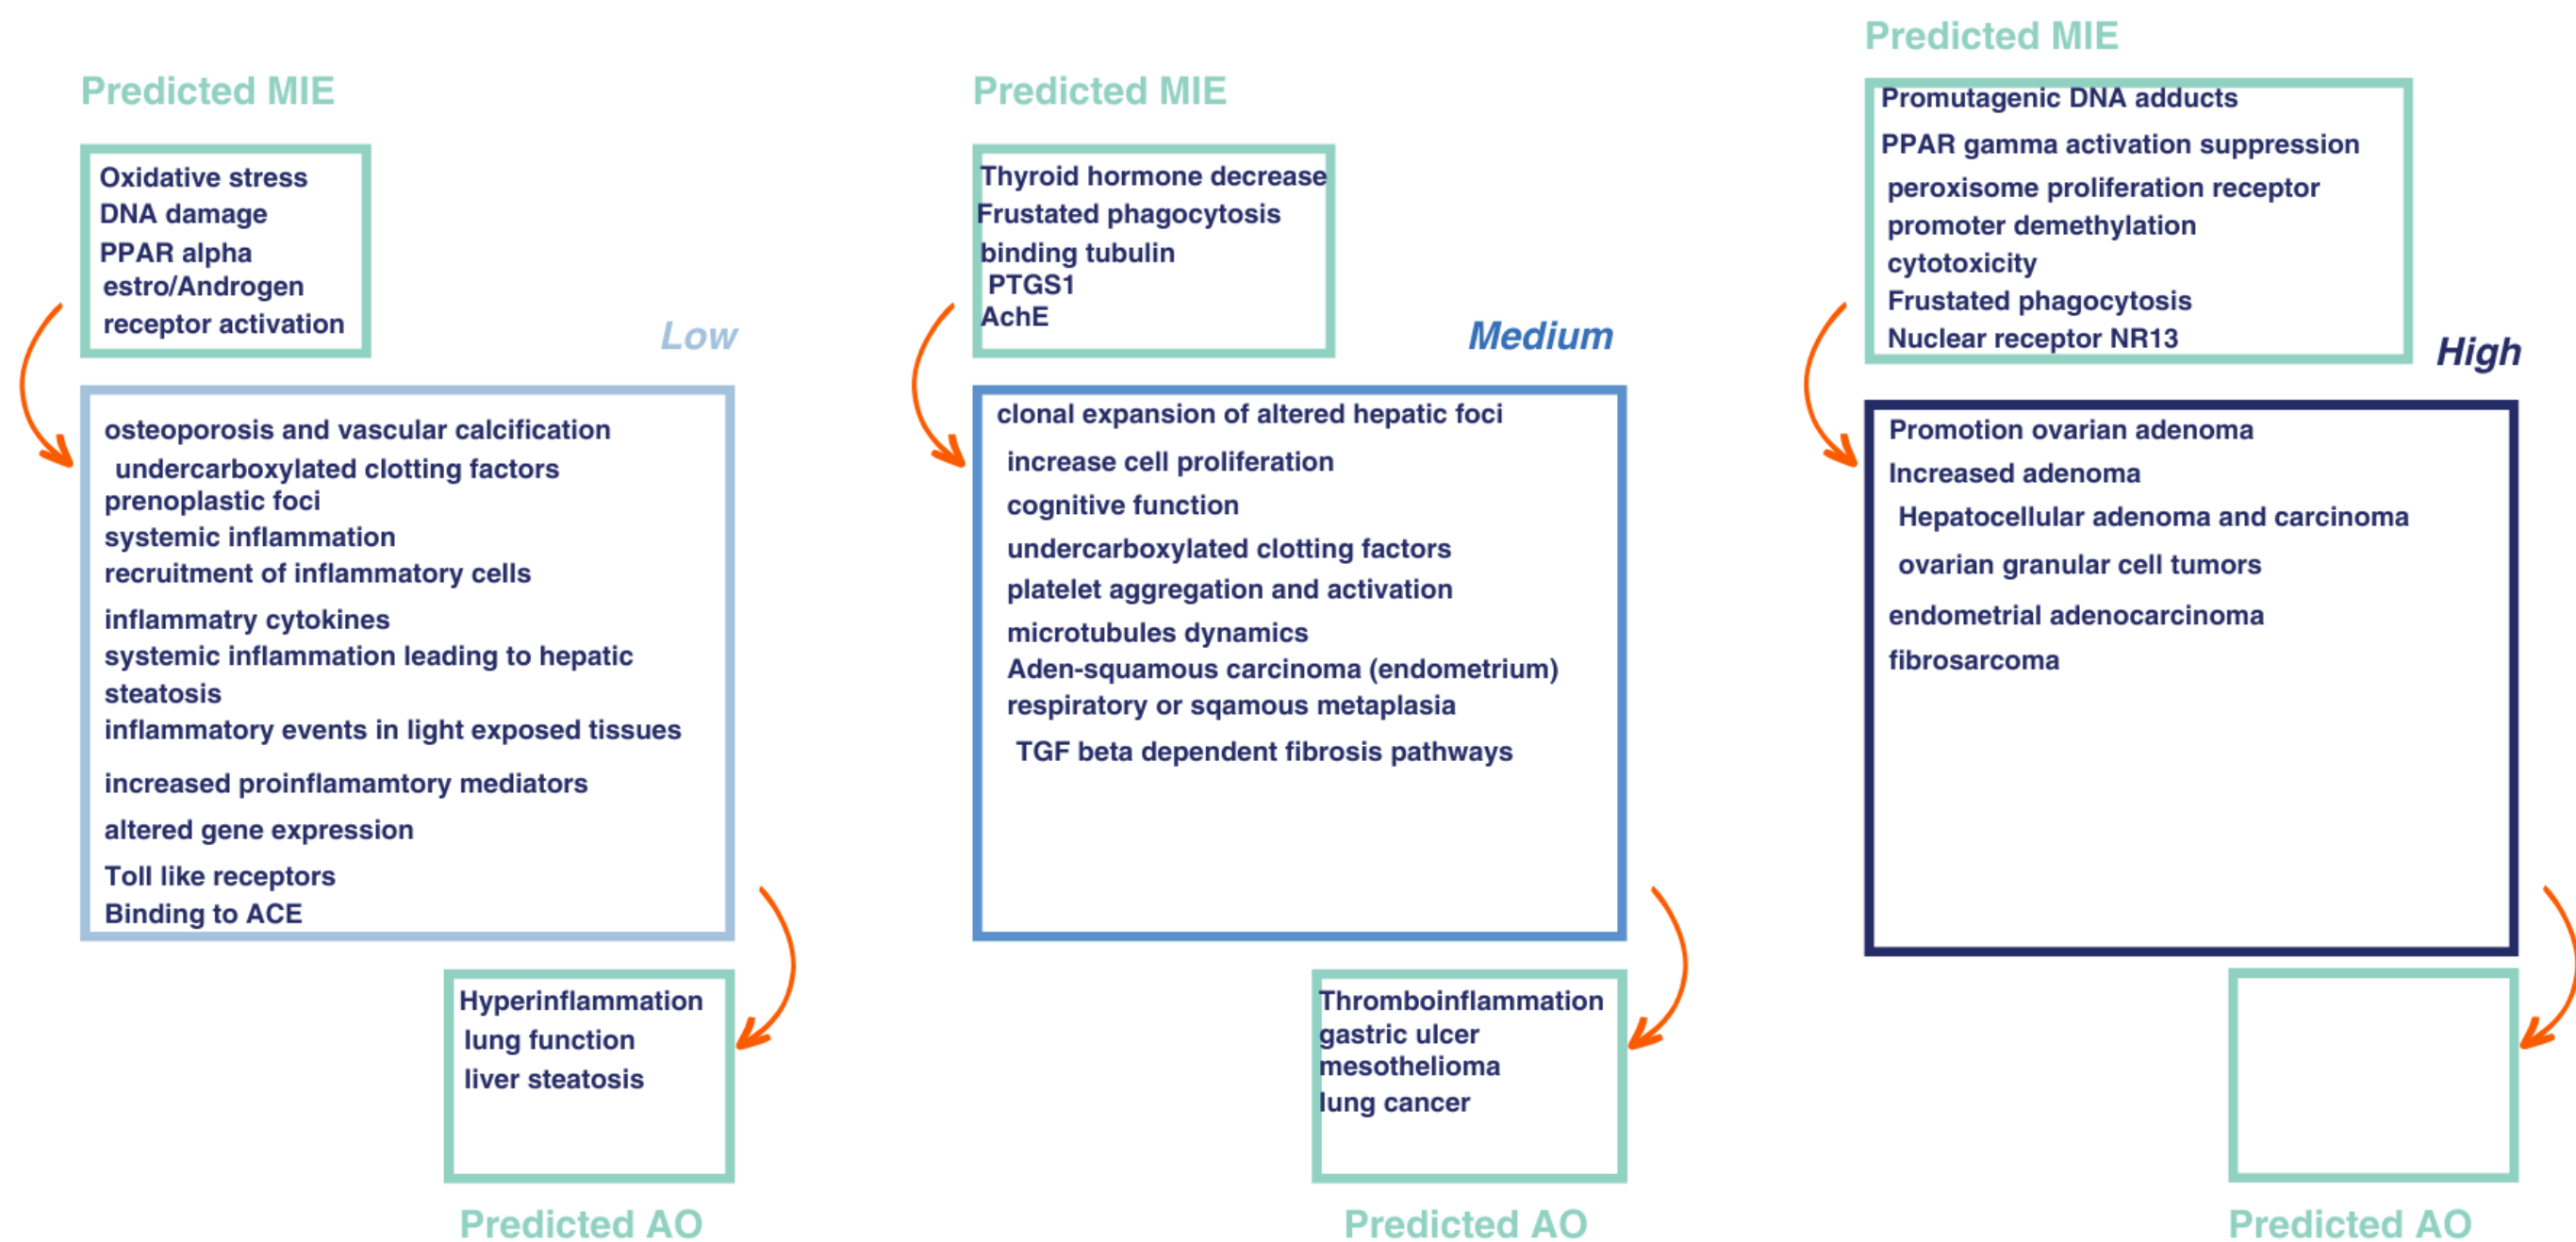

**Figure S4:** AOP-based reconstructed mechanism of materials associated with different hazard levels, as described in Fortino et al.

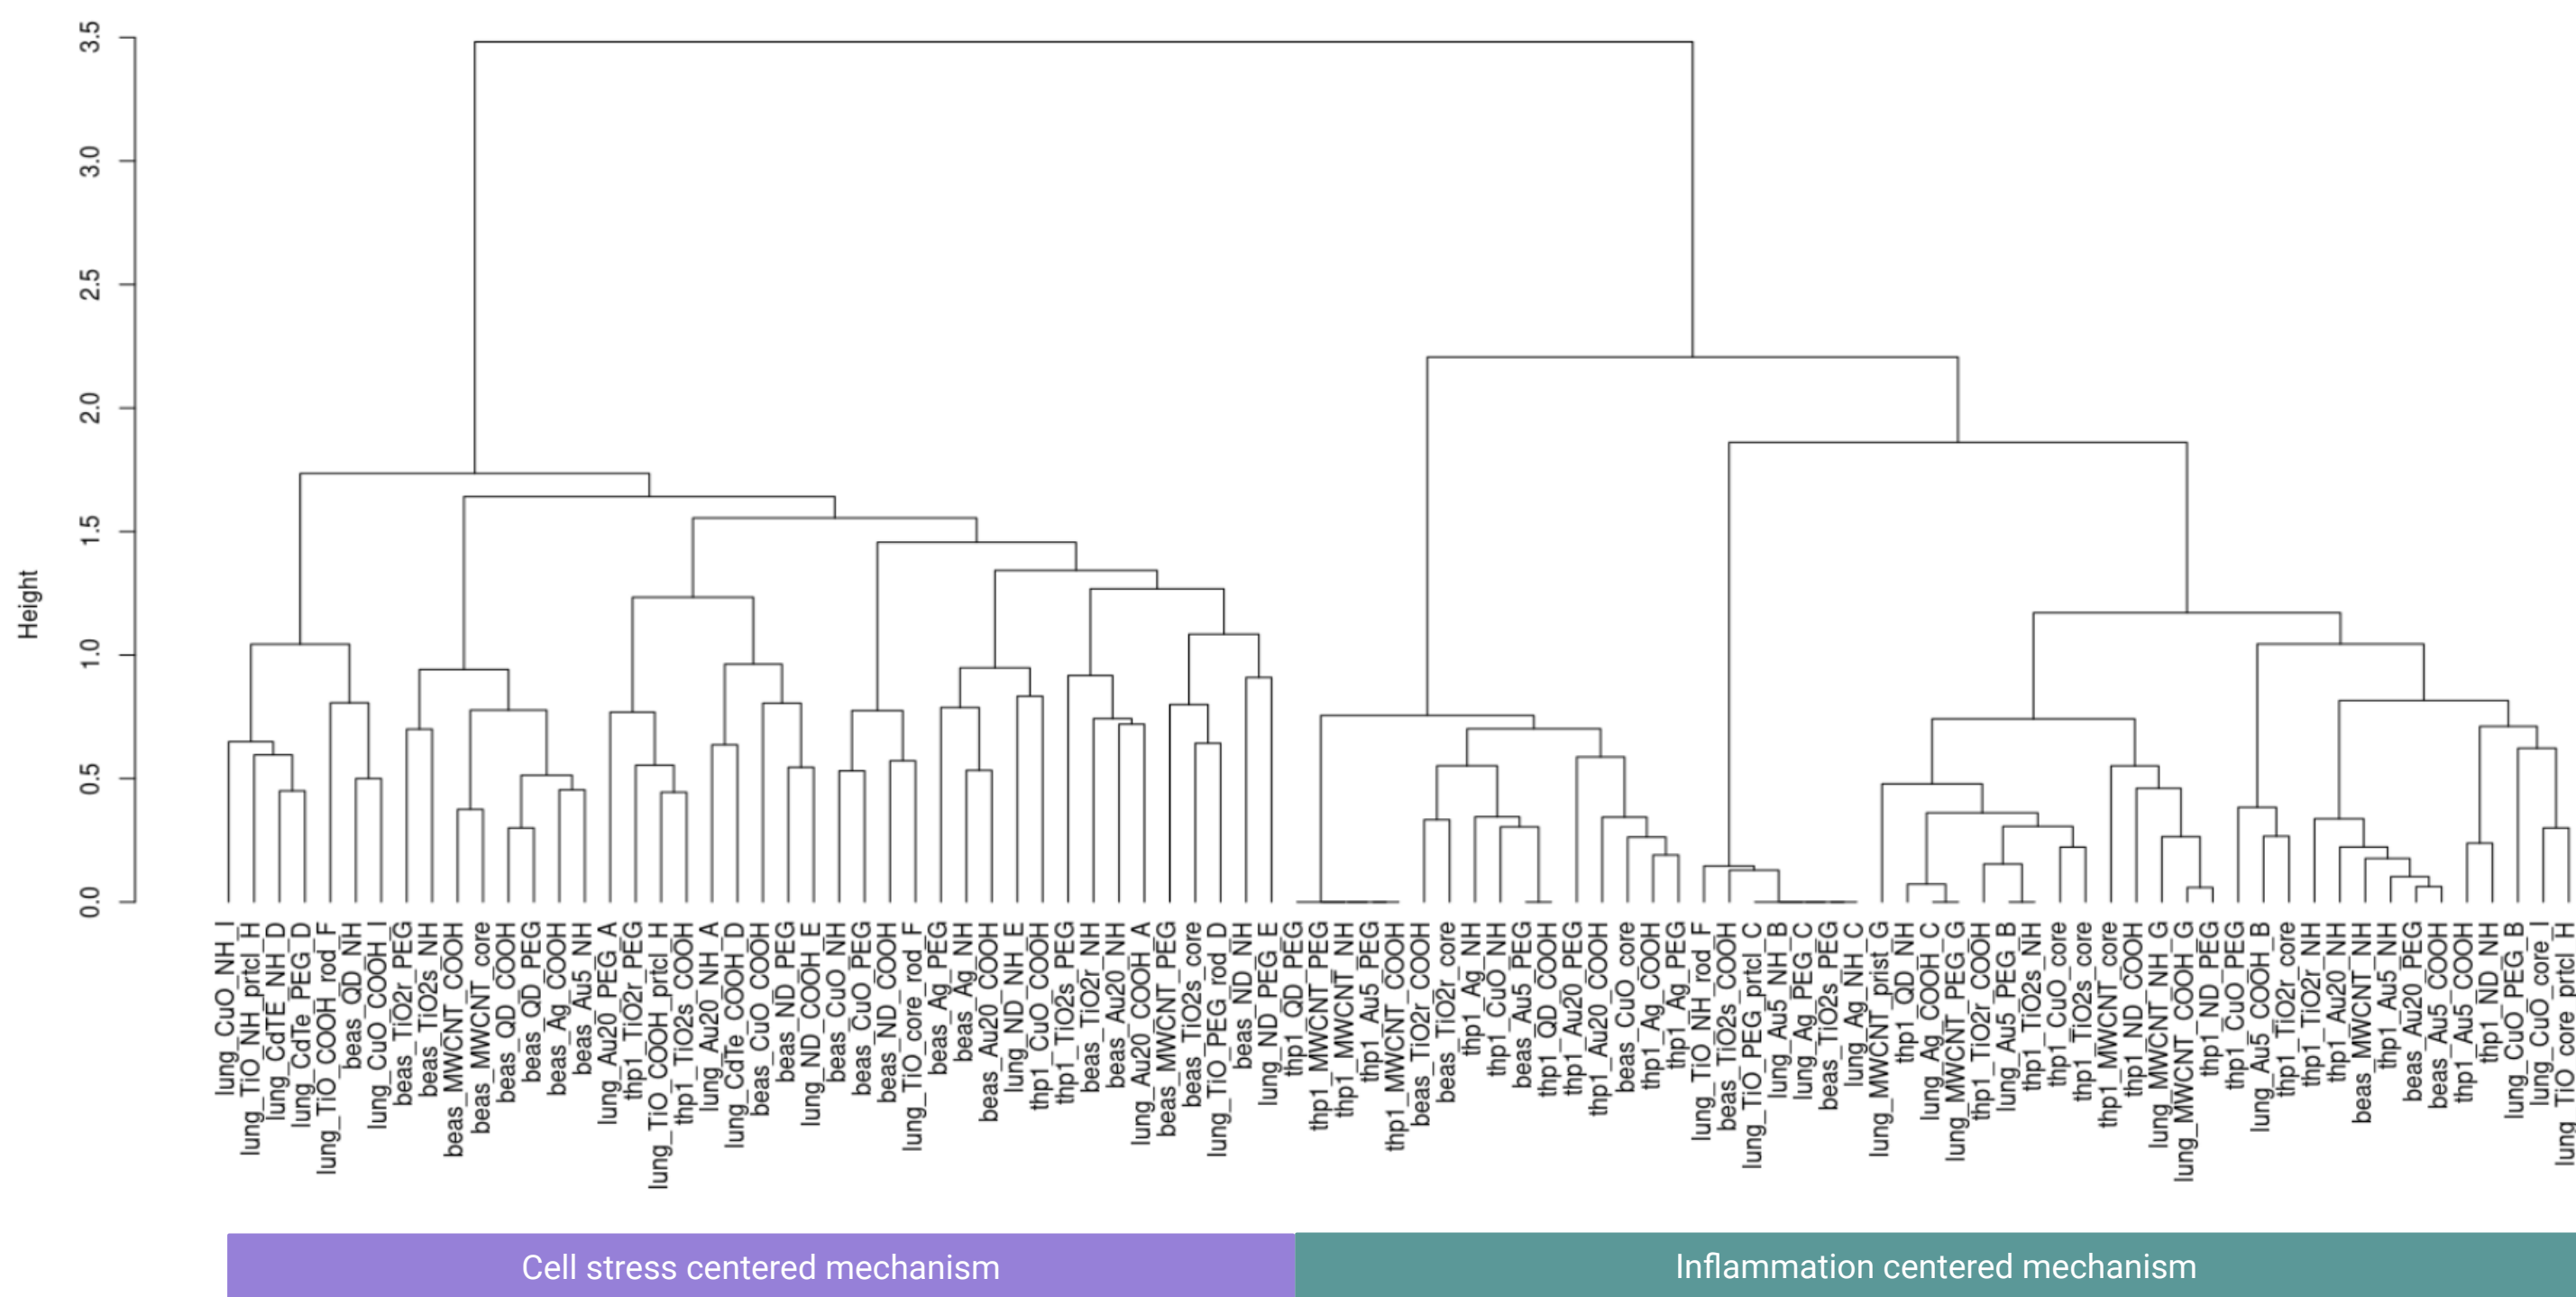

**Figure S5:** Dendrogram representing the hierarchical clustering of the 93 exposure AOP-based responses. The distance used is based on the mean of the jaccard index between networks nodes and edges. Annotation has been performed evaluating the results of the AOP-based mechanism for each exposure.

Table S1: Enriched events in the three test systems (CuO\_Core)

| THP1                                                               | Lung                                                            | BEAS-2B                                                          |
|--------------------------------------------------------------------|-----------------------------------------------------------------|------------------------------------------------------------------|
| systemic inflammatory response syndrome                            | Increased, inflammation                                         | Altered, Gene Expression                                         |
| Diminished protective oxidative stress response                    | Suppression, Inflammatory cytokines                             | Decrease, Cell proliferation                                     |
| Increased, recruitment of inflammatory cells                       | systemic inflammatory response syndrome                         | systemic inflammatory response syndrome                          |
| Decrease, Cell proliferation                                       | Increased, recruitment of inflammatory cells                    | Antagonism, Thyroid Receptor                                     |
| Increased, inflammation                                            | Inflammatory events in light-exposed tissues                    | Increase cell proliferation                                      |
| systemic inflammation leading to hepatic steatosis                 | Increased Pro-inflammatory mediators                            | Increase, Clonal Expansion of Altered Hepatic Foci               |
| Inflammatory events in light-exposed tissues                       | systemic inflammation leading to hepatic steatosis              | Increased, recruitment of inflammatory cells                     |
| Increased Pro-inflammatory mediators                               | Altered, Chromosome number                                      | Increased, inflammation                                          |
| NFE2/Nrf2 repression                                               | Increased, Chromosome missegregation                            | Apoptotic cell death                                             |
| Suppression, Inflammatory cytokines                                | Disruption, Microtubule dynamics                                | Inflammatory events in light-exposed tissues                     |
| Altered gene expression, NRF2 dependent antioxidant pathway        | Binding of microtubule stabilizing agents (MSA) to microtubules | systemic inflammation leading to hepatic steatosis               |
| Decreased, Apoptosis (Epithelial Cells)                            | Impaired inguinoscrotal testicular descent phase                | Suppression, Inflammatory cytokines                              |
|                                                                    |                                                                 | Increased Pro-inflammatory mediators                             |
|                                                                    |                                                                 | Altered gene expression, TGF- $\beta$ dependent fibrosis pathway |
|                                                                    |                                                                 | Binding to ACE2                                                  |
|                                                                    |                                                                 | Increase activation, Nuclear factor kappa B (NF- $\kappa$ B)     |
|                                                                    |                                                                 | Release, Cytokine                                                |
| <b>THP1-AO predicted</b>                                           | <b>Lung-AO predicted</b>                                        | <b>BEAS-2B-AO predicted</b>                                      |
| Inflammatory events in light-exposed tissues                       | Inflammatory events in light-exposed tissues                    | Inflammatory events in light-exposed tissues                     |
| Decrease, Growth                                                   | Hyperinflammation                                               | Decrease, Growth                                                 |
| Increased, mesotheliomas                                           | N/A, Breast Cancer                                              | Apoptotic cell death                                             |
| Hyperinflammation                                                  | Increased, mesotheliomas                                        | Hyperinflammation                                                |
| Increased, Ductal Hyperplasia                                      | N/A, Neurodegeneration                                          | Increased, mesotheliomas                                         |
| N/A, Neurodegeneration                                             | Reduced, Reproductive Success                                   | Ororofacial clefting                                             |
| Increase, DNA damage                                               | Malformation, cryptorchidism - maldescended testis              | Cognitive Function, Decreased                                    |
| Increased, Liver Steatosis                                         | Increased, Liver Steatosis                                      | Neural tube defects                                              |
| Increased, steatosis                                               | Increase, Aneuploid offspring                                   | Cholestasis, Pathology                                           |
| Ororofacial clefting                                               | Sensory axonal peripheral neuropathy                            | N/A, Neurodegeneration                                           |
| Apoptotic cell death                                               | Increase, Mutations                                             | Immune mediated hepatitis                                        |
| N/A, Breast Cancer                                                 | N/A, Liver fibrosis                                             | N/A, Breast Cancer                                               |
| N/A, Liver fibrosis                                                | Decrease, Lung function                                         | Increased, Liver Steatosis                                       |
| Increase, Mutations                                                | Accumulation, Liver lipid                                       | Increase, Mutations                                              |
| Decrease, Lung function                                            | impaired, Fertility                                             | Increased, Ductal Hyperplasia                                    |
| Accumulation, Liver lipid                                          | Impairment, Learning and memory                                 | Decrease, Lung function                                          |
| Increased Mortality                                                | Increased Mortality                                             | Increased Mortality                                              |
| impaired, Fertility                                                |                                                                 |                                                                  |
| <b>THP1-MIE predicted</b>                                          | <b>Lung-MIE predicted</b>                                       | <b>BEAS-2B-MIE predicted</b>                                     |
| systemic inflammation leading to hepatic steatosis                 | systemic inflammation leading to hepatic steatosis              | systemic inflammation leading to hepatic steatosis               |
| NFE2/Nrf2 repression                                               | Binding of microtubule stabilizing agents (MSA) to microtubules | Antagonism, Thyroid Receptor                                     |
| Alkylation, Protein                                                | Oxidative Stress                                                | Oxidative Stress                                                 |
| Bradykinin system, hyperactivated                                  | Binding, Tubulin                                                | Alkylation, Protein                                              |
| Increase, DNA damage                                               | Bradykinin system, hyperactivated                               | Inhibition, Bile Salt Export Pump (ABCB11)                       |
| ROS generation from photoactivated chemicals                       | Alkylation, Protein                                             | Increase, Cytotoxicity (epithelial cells)                        |
| Covalent Binding, Protein                                          | Covalent Binding, Protein                                       | Histone deacetylase inhibition                                   |
| Oxidative Stress                                                   | Increase, DNA damage                                            | Frustrated phagocytosis                                          |
| Fibrinolysis, decreased                                            | ROS generation from photoactivated chemicals                    | Activation, Estrogen receptor                                    |
| Activation, Glucocorticoid Receptor                                | Frustrated phagocytosis                                         | benzoquinone imine and acylglucuronide metabolites               |
| Binding, Thio/seleno-proteins involved in protection against oxid: | Activation, Glucocorticoid Receptor                             | ROS generation from photoactivated chemicals                     |
| Frustrated phagocytosis                                            | Activation of Cyp2E1                                            | Activation of Cyp2E1                                             |
| Increase in reactive oxygen and nitrogen species (RONS)            | Antagonism, Androgen receptor                                   | Increase, DNA damage                                             |
| Activation of Cyp2E1                                               | Fibrinolysis, decreased                                         | Covalent Binding, Protein                                        |
| Inhibition, IKK complex                                            | Increase in reactive oxygen and nitrogen species (RONS)         | Increase in reactive oxygen and nitrogen species (RONS)          |
| Non-coding RNA expression profile alteration                       | Inhibition, IKK complex                                         | Inhibition, IKK complex                                          |
| Inhibition, NADH-ubiquinone oxidoreductase (complex I)             | Non-coding RNA expression profile alteration                    |                                                                  |
| Acetylcholinesterase (AChE) Inhibition                             | Inhibition, NADH-ubiquinone oxidoreductase (complex I)          |                                                                  |



Enriched events in the three test systems (CuO\_NH2)

| THP1                                                               | Lung                                                             | BEAS-2B                                                                       |
|--------------------------------------------------------------------|------------------------------------------------------------------|-------------------------------------------------------------------------------|
| systemic inflammatory response syndrome                            | Altered, Chromosome number                                       | Cognitive Function, Decreased                                                 |
| Decrease, Cell proliferation                                       | Increased, Chromosome missegregation                             | Altered, Gene Expression                                                      |
| Increased, recruitment of inflammatory cells                       | Increase, Clonal Expansion of Altered Hepatic Foci               | Apoptotic cell death                                                          |
| Inflammatory events in light-exposed tissues                       | Increase cell proliferation                                      | General Apoptosis                                                             |
| Increased, inflammation                                            | Disruption, Microtubule dynamics                                 | Increase, Apoptosis                                                           |
| Increase activation, Nuclear factor kappa B (NF-kB)                | Decrease, Cell proliferation                                     | Decreased, Apoptosis (Epithelial Cells)                                       |
| Increased Pro-inflammatory mediators                               | Altered, Meiotic chromosome dynamics                             | Apoptosis of adult Leydig cells, Decreased testosterone by adult Leydig cells |
| systemic inflammation leading to hepatic steatosis                 | Binding of microtubule stabilizing agents (MSA) to microtubules  | Apoptosis                                                                     |
| Suppression, Inflammatory cytokines                                | Suppression, Inflammatory cytokines                              | Antagonism, Thyroid Receptor                                                  |
| Inhibition, Nuclear factor kappa B (NF-kB)                         | Inadequate DNA repair                                            | Abnormal, Glucose homeostasis                                                 |
| Apoptotic cell death                                               | Disorganization, Meiotic Spindle                                 | Decreased steroidogenesis, Increased Apoptosis of Adult Leydig Cells          |
| Diminished protective oxidative stress response                    | systemic inflammation leading to hepatic steatosis               | Cell injury/death                                                             |
| Increase, Clonal Expansion of Altered Hepatic Foci                 |                                                                  | persistent, cytotoxicity (pleura or peritoneum)                               |
| Increase cell proliferation                                        |                                                                  |                                                                               |
| Altered gene expression, TGF-β dependent fibrosis pathway          |                                                                  |                                                                               |
| Decreased, Apoptosis (Epithelial Cells)                            |                                                                  |                                                                               |
| THP1-AO predicted                                                  | Lung-AO predicted                                                | BEAS-2B-AO predicted                                                          |
| Inflammatory events in light-exposed tissues                       | Reduced, Reproductive Success                                    | Apoptosis                                                                     |
| Increase, Increased susceptibility to infection                    | Decrease, Growth                                                 | Apoptotic cell death                                                          |
| Decrease, Growth                                                   | Increased, Liver Steatosis                                       | N/A, Neurodegeneration                                                        |
| Increased, mesotheliomas                                           | Ororofacial clefting                                             | Decrease, Growth                                                              |
| Apoptotic cell death                                               | Increase, Aneuploid offspring                                    | Neurodegeneration                                                             |
| Hyperinflammation                                                  | Sensory axonal peripheral neuropathy                             | Gestational diabetes mellitus                                                 |
| Increased, Ductal Hyperplasia                                      | Accumulation, Liver lipid                                        | Reduce, Sperm count                                                           |
| Increased, Liver Steatosis                                         | Impairment, Learning and memory                                  | Neural tube defects                                                           |
| Immune mediated hepatitis                                          | impaired, Fertility                                              | Cognitive Function, Decreased                                                 |
| Ororofacial clefting                                               | Increased Mortality                                              | Increase risk, microcephaly                                                   |
| N/A, Neurodegeneration                                             | N/A, Liver fibrosis                                              | Liver Injury                                                                  |
| N/A, Breast Cancer                                                 |                                                                  | Increase, Ductal Hyperplasia                                                  |
| Increase, Mutations                                                |                                                                  | Increase, DNA damage                                                          |
| Decrease, Lung function                                            |                                                                  | Necrotic Tissue                                                               |
| Increased Mortality                                                |                                                                  | Immune mediated hepatitis                                                     |
|                                                                    |                                                                  | N/A, Breast Cancer                                                            |
|                                                                    |                                                                  | impaired, Fertility                                                           |
| THP1-MIE predicted                                                 | Lung-MIE predicted                                               | BEAS-2B-MIE predicted                                                         |
| systemic inflammation leading to hepatic steatosis                 | systemic inflammation leading to hepatic steatosis               | Oxidative Stress                                                              |
| Oxidative Stress                                                   | Binding of microtubule stabilizing agents (MSA) to microtubules  | Antagonism, Thyroid Receptor                                                  |
| Activation, Glucocorticoid Receptor                                | Increase, DNA damage                                             | Alkylation, Protein                                                           |
| Increase, Cytotoxicity (epithelial cells)                          | Binding, Tubulin                                                 | Mitochondrial impairment                                                      |
| Bradykinin system, hyperactivated                                  | Histone deacetylase inhibition                                   | Histone deacetylase inhibition                                                |
| Alkylation, Protein                                                | Activation, Glucocorticoid Receptor                              | Activation, Estrogen receptor                                                 |
| Increase, DNA damage                                               | Inhibition, IKK complex                                          | Increase, Hepatic thyroid hormone uptake/transport                            |
| ROS generation from photoactivated chemicals                       | Oxidative Stress                                                 | Activation, AhR                                                               |
| Covalent Binding, Protein                                          | Inhibition, NADH-ubiquinone oxidoreductase (complex I)           | Thyroperoxidase, Inhibition                                                   |
| Prolonged TLR9 activation                                          | Binding of inhibitor to mitochondrial complex III                | Overactivation, NMDARs                                                        |
| Inhibition, IKK complex                                            | Increase, Cytotoxicity (epithelial cells)                        | Increase, DNA damage                                                          |
| Activation of Cyp2E1                                               | Increase in reactive oxygen and nitrogen species (RONS)          | Inhibition, NADH-ubiquinone oxidoreductase (complex I)                        |
| Frustrated phagocytosis                                            | Overactivation, NMDARs                                           | Non-coding RNA expression profile alteration                                  |
| Fibrinolysis, decreased                                            | Activation, PARP1                                                | Thyroid hormone synthesis, Decreased                                          |
| benzoquinone imine and acylglucuronide metabolites                 | Binding of inhibitor, NADH-ubiquinone oxidoreductase (complex I) | Inhibition, Na <sup>+</sup> /I <sup>-</sup> symporter (NIS)                   |
| Increase in reactive oxygen and nitrogen species (RONS)            |                                                                  | Acetylcholinesterase (AChE) Inhibition                                        |
| Oxidation, Glutathione (To be considered with MIE)                 |                                                                  |                                                                               |
| Binding of agonist, Angiotensin II receptor type 1 receptor (AT1R) |                                                                  |                                                                               |

Enriched events in the three test systems (MWCNT)

| THP1                                               | Lung                                              | BEAS-2B                                                          |
|----------------------------------------------------|---------------------------------------------------|------------------------------------------------------------------|
| systemic inflammatory response syndrome            | Increased, inflammation                           | Altered, Gene Expression                                         |
| Increased, recruitment of inflammatory cells       | Increased, recruitment of inflammatory cells      | Increase, Preneoplastic foci (hepatocytes)                       |
| Increased Pro-inflammatory mediators               | systemic inflammatory response syndrome           | modulation, Extracellular Matrix Composition                     |
| Suppression, Inflammatory cytokines                | Bulky DNA adducts, increase                       | sensitisation, skin                                              |
| systemic inflammation leading to hepatic steatosis | Release, Cytokine                                 | Increase, hepatocellular adenomas and carcinomas                 |
| Increased, inflammation                            | Increased Pro-inflammatory mediators              | Increased, Fibrosarcoma                                          |
| Inflammatory events in light-exposed tissues       | Increased, secretion of proinflammatory mediators | Tumorigenesis, Hepatocellular carcinoma                          |
| Increased, Intracellular Calcium overload          | Lung fibrosis                                     | Increase, Endometrial adenocarcinomas                            |
| Cognitive Function, Decreased                      | Increased, secretion of local growth factors      | Altered gene expression, TGF- $\beta$ dependent fibrosis pathway |
| Increased, Angiogenesis                            | Impaired inguinoscrotal testicular descent phase  | Increased, adenomas (pituitary)                                  |
| Binding to ACE2                                    | Inflammatory events in light-exposed tissues      | Testicular Cancer                                                |
|                                                    |                                                   | Promotion, ovarian granular cell tumors                          |
|                                                    |                                                   | Increase, lung cancer                                            |

| THP1-AO predicted                            | Lung-AO predicted                                  | BEAS-2B-AO predicted                    |
|----------------------------------------------|----------------------------------------------------|-----------------------------------------|
| Inflammatory events in light-exposed tissues | Inflammatory events in light-exposed tissues       | sensitisation, skin                     |
| Lung fibrosis                                | Lung fibrosis                                      | Tumorigenesis, Hepatocellular carcinoma |
| Cognitive Function, Decreased                | Hyperinflammation                                  | Increase, Endometrial adenocarcinomas   |
| Increased, mesotheliomas                     | Increased, mesotheliomas                           | Increased, adenomas (pituitary)         |
| Hyperinflammation                            | N/A, Breast Cancer                                 | Promotion, ovarian granular cell tumors |
| N/A, Breast Cancer                           | Malformation, cryptorchidism - maldescended testis | Increase, lung cancer                   |
| N/A, Neurodegeneration                       | Cholestasis, Pathology                             | Neural tube defects                     |
| N/A, Liver fibrosis                          | N/A, Neurodegeneration                             | Increased, Ductal Hyperplasia           |
| Increase, Mutations                          | Increase, Mutations                                | Increase, DNA damage                    |
| Increased, Liver Steatosis                   | Increase, Cancer                                   |                                         |
| Decrease, Growth                             | Increase, Heritable mutations in offspring         |                                         |
| Necrotic Tissue                              | Decrease, Lung function                            |                                         |
| Decrease, Lung function                      | Increased Mortality                                |                                         |
| Accumulation, Liver lipid                    |                                                    |                                         |
| Increased Mortality                          |                                                    |                                         |

| THP1-MIE predicted                                          | Lung-MIE predicted                                                | BEAS-2B-MIE predicted                                           |
|-------------------------------------------------------------|-------------------------------------------------------------------|-----------------------------------------------------------------|
| systemic inflammation leading to hepatic steatosis          | Bulky DNA adducts, increase                                       | Formation, Pro-mutagenic DNA Adducts                            |
| ROS generation from photoactivated chemicals                | Frustrated phagocytosis                                           | Activation, Androgen receptor                                   |
| Antagonism, Thyroid Receptor                                | Activation of specific nuclear receptors, PPAR-gamma activation   | Activation, Constitutive androstane receptor                    |
| Oxidative Stress                                            | Covalent Binding, Protein                                         | Increase, Cytotoxicity (hepatocytes)                            |
| Inositol triphosphate receptor activation                   | Fibrinolysis, decreased                                           | Activation, Estrogen receptor                                   |
| Overactivation, NMDARs                                      | Oxidative Stress                                                  | Histone deacetylase inhibition                                  |
| Covalent Binding, Protein                                   | Inhibition, Bile Salt Export Pump (ABCB11)                        | Alkylation, DNA                                                 |
| Alkylation, Protein                                         | Increase, DNA damage                                              | Activation, PPAR $\alpha$                                       |
| Thyroperoxidase, Inhibition                                 | peroxisome proliferator activated receptor promoter demethylation | Increase, DNA damage                                            |
| Activation, AhR                                             | Alkylation, Protein                                               | Covalent Binding, Protein                                       |
| Increased, Hepatic thyroid hormone uptake/transport         | ROS generation from photoactivated chemicals                      | Activation of specific nuclear receptors, PPAR-gamma activation |
| Frustrated phagocytosis                                     | Bradykinin system, hyperactivated                                 | Increase, Oxidative damage to DNA                               |
| Thyroid hormone synthesis, Decreased                        | Antagonism, Androgen receptor                                     | Bulky DNA adducts, increase                                     |
| Binding of agonist, Ionotropic glutamate receptors          | Increase in reactive oxygen and nitrogen species (RONS)           | Increased, DNA damage and mutation                              |
| Increase, DNA damage                                        | Activation of Cyp2E1                                              | Oxidative Stress                                                |
| Acetylcholinesterase (AChE) Inhibition                      | Non-coding RNA expression profile alteration                      | Activation, NR1H4                                               |
| Inhibition, Na <sup>+</sup> /I <sup>-</sup> symporter (NIS) | Inhibition, NADH-ubiquinone oxidoreductase (complex I)            | Increase in reactive oxygen and nitrogen species (RONS)         |
| Increase in reactive oxygen and nitrogen species (RONS)     | Acetylcholinesterase (AChE) Inhibition                            |                                                                 |
| Activation of Cyp2E1                                        |                                                                   |                                                                 |
| Inhibition, IKK complex                                     |                                                                   |                                                                 |

Enriched events in the three test systems

| THP1                                                                                                                                                                                                                                                                                                                                                                                                                                                                                                                                                                                                                                                       | Lung                                                                                                                                                                                                                                                                                                                                                                                                                                                                                                                                                                                                             | BEAS-2B                                                                                                                                                                                                                                                                                                                                                                                                                                                                                                                                                                                                                                                                                                                                                                                                                  |
|------------------------------------------------------------------------------------------------------------------------------------------------------------------------------------------------------------------------------------------------------------------------------------------------------------------------------------------------------------------------------------------------------------------------------------------------------------------------------------------------------------------------------------------------------------------------------------------------------------------------------------------------------------|------------------------------------------------------------------------------------------------------------------------------------------------------------------------------------------------------------------------------------------------------------------------------------------------------------------------------------------------------------------------------------------------------------------------------------------------------------------------------------------------------------------------------------------------------------------------------------------------------------------|--------------------------------------------------------------------------------------------------------------------------------------------------------------------------------------------------------------------------------------------------------------------------------------------------------------------------------------------------------------------------------------------------------------------------------------------------------------------------------------------------------------------------------------------------------------------------------------------------------------------------------------------------------------------------------------------------------------------------------------------------------------------------------------------------------------------------|
| Decrease, Cell proliferation<br>Increase, Preneoplastic foci (hepatocytes)<br>Increased CGRP, neuronal release of CGRP<br>Increased Pro-inflammatory mediators<br>systemic inflammation leading to hepatic steatosis<br>Increased, inflammation<br>systemic inflammatory response syndrome<br>Increased, recruitment of inflammatory cells<br>Suppression, Inflammatory cytokines                                                                                                                                                                                                                                                                          | Altered, Chromosome number<br>Increased, Chromosome missegregation<br>Increase cell proliferation<br>Increase, Clonal Expansion of Altered Hepatic Foci<br>Suppression, Inflammatory cytokines<br>systemic inflammation leading to hepatic steatosis<br>Increased, inflammation<br>Altered, Meiotic chromosome dynamics<br>Increased, recruitment of inflammatory cells<br>Increased Pro-inflammatory mediators<br>systemic inflammatory response syndrome<br>Inflammatory events in light-exposed tissues (TiO2s)                                                                                               | Tumorigenesis, Hepatocellular carcinoma<br>Increase, hepatocellular adenomas and carcinomas<br>Testicular Cancer<br>Increased, Fibrosarcoma<br>Increased, adenomas (pituitary)<br>Increase, lung cancer<br>Promotion, ovarian adenomas<br>Increase, Endometrial adenocarcinomas<br>Increase, Respiratory or Squamous Metaplasia<br>Promotion, ovarian granular cell tumors<br>Increased, adenosquamous carcinomas of endometrium<br>modulation, Extracellular Matrix Composition<br>Increased, Intracellular Calcium overload<br>Glucocorticoid Receptor mediated alterations in steroidogenic enzymes, Decreased testosterone by adult Leydig cells                                                                                                                                                                     |
| THP1-AO predicted                                                                                                                                                                                                                                                                                                                                                                                                                                                                                                                                                                                                                                          | Lung-AO predicted                                                                                                                                                                                                                                                                                                                                                                                                                                                                                                                                                                                                | BEAS-2B-AO predicted                                                                                                                                                                                                                                                                                                                                                                                                                                                                                                                                                                                                                                                                                                                                                                                                     |
| Hyperinflammation<br>Decrease, Growth<br>Increased, mesotheliomas<br>Increased Respiratory irritability and Chronic Cough,<br>N/A, Neurodegeneration<br>N/A, Breast Cancer<br>Orofacial clefting<br>N/A, Liver fibrosis<br>Trigeminal and/or vagal nerve excitation causes Airway Hyper-respon<br>Increased, Liver Steatosis<br>Increase, Mutations<br>Decrease, Lung function<br>Accumulation, Liver lipid<br>Increased Mortality                                                                                                                                                                                                                         | Inflammatory events in light-exposed tissues<br>Hyperinflammation<br>Reduced, Reproductive Success<br>N/A, Breast Cancer<br>N/A, Neurodegeneration<br>Increase, Aneuploid offspring<br>Increased, mesotheliomas<br>impaired, Fertility<br>Increased, Liver Steatosis<br>N/A, Liver fibrosis<br>Increase, Mutations<br>Decrease, Lung function<br>Accumulation, Liver lipid<br>Increased Mortality                                                                                                                                                                                                                | Tumorigenesis, Hepatocellular carcinoma<br>Increase, Endometrial adenocarcinomas<br>Promotion, ovarian adenomas<br>Promotion, ovarian granular cell tumors<br>Increased, adenosquamous carcinomas of endometrium<br>Increased, adenomas (pituitary)<br>Increase, lung cancer<br>N/A, Neurodegeneration<br>Decrease, Growth<br>Increase, Site of Contact Nasal Tumors<br>Increased, mesotheliomas<br>Necrotic Tissue                                                                                                                                                                                                                                                                                                                                                                                                      |
| THP1-MIE predicted                                                                                                                                                                                                                                                                                                                                                                                                                                                                                                                                                                                                                                         | Lung-MIE predicted                                                                                                                                                                                                                                                                                                                                                                                                                                                                                                                                                                                               | BEAS-2B-MIE predicted                                                                                                                                                                                                                                                                                                                                                                                                                                                                                                                                                                                                                                                                                                                                                                                                    |
| systemic inflammation leading to hepatic steatosis<br>Increase, Cytotoxicity (hepatocytes)<br>Activation, Androgen receptor<br>Activation, PPAR $\alpha$<br>Alkylation, Protein<br>Covalent Binding, Protein<br>Oxidative Stress<br>Activation of Cyp2E1<br>Bradykinin system, hyperactivated<br>Increase, DNA damage<br>Frustrated phagytosis<br>Fibrinolysis, decreased<br>Activation, Glucocorticoid Receptor<br>Increase in reactive oxygen and nitrogen species (RONS)<br>Inhibition, IKK complex<br>Inhibition, NADH-ubiquinone oxidoreductase (complex I)<br>Non-coding RNA expression profile alteration<br>Acetylcholinesterase (AChE) Inhibition | systemic inflammation leading to hepatic steatosis<br>Binding, Tubulin<br>Oxidative Stress<br>Activation, Glucocorticoid Receptor<br>Alkylation, Protein<br>Activation of Cyp2E1<br>Frustrated phagytosis<br>Histone deacetylase inhibition<br>Bradykinin system, hyperactivated<br>ROS generation from photoactivated chemicals<br>Increase, DNA damage<br>Covalent Binding, Protein<br>Fibrinolysis, decreased<br>Increase in reactive oxygen and nitrogen species (RONS)<br>Inhibition, IKK complex<br>Inhibition, NADH-ubiquinone oxidoreductase (complex I)<br>Non-coding RNA expression profile alteration | Formation, Pro-mutagenic DNA Adducts<br>Inositol triphosphate receptor activation<br>Overactivation, NMDARs<br>Binding of agonist, Ionotropic glutamate receptors<br>Alkylation, DNA<br>Increase, DNA damage<br>Increased, DNA damage and mutation<br>Increase, Oxidative damage to DNA<br>Bulky DNA adducts, increase<br>Activation of metabotropic glutamate receptor<br>Activation of specific nuclear receptors, PPAR-gamma activation<br>Decrease, Intracellular pH<br>Inhibition GABAA receptor<br>Oxidative Stress<br>Increase, Cytotoxicity (epithelial cells)<br>Peptide Oxidation<br>Inhibition, NADH-ubiquinone oxidoreductase (complex I)<br>Activated, presynaptic neuron 1<br>peroxisome proliferator activated receptor promoter demethylation<br>Increase in reactive oxygen and nitrogen species (RONS) |

Enriched events in the three test systems (TiO2r)

| THP1                                                                                                                                                                                                                                                                                                                                                                                                                                                                                                                                                                                                                                                                                                                                        | Lung                                                                                                                                                                                                                                                                                                                                                                                                                                                                                                                                                                                                                                                                                                          | BEAS-2B                                                                                                                                                                                                                                                                                                                                                                                                                                                                                                                                                                                                                                                                                                                                              |
|---------------------------------------------------------------------------------------------------------------------------------------------------------------------------------------------------------------------------------------------------------------------------------------------------------------------------------------------------------------------------------------------------------------------------------------------------------------------------------------------------------------------------------------------------------------------------------------------------------------------------------------------------------------------------------------------------------------------------------------------|---------------------------------------------------------------------------------------------------------------------------------------------------------------------------------------------------------------------------------------------------------------------------------------------------------------------------------------------------------------------------------------------------------------------------------------------------------------------------------------------------------------------------------------------------------------------------------------------------------------------------------------------------------------------------------------------------------------|------------------------------------------------------------------------------------------------------------------------------------------------------------------------------------------------------------------------------------------------------------------------------------------------------------------------------------------------------------------------------------------------------------------------------------------------------------------------------------------------------------------------------------------------------------------------------------------------------------------------------------------------------------------------------------------------------------------------------------------------------|
| Altered, Gene Expression<br>Release, Cytokine<br>Increase cell proliferation<br>Increased Pro-inflammatory mediators<br>Altered gene expression, TGF-β dependent fibrosis pathway<br>systemic inflammation leading to hepatic steatosis<br>modulation, Extracellular Matrix Composition<br>Suppression, Inflammatory cytokines<br>Inflammatory events in light-exposed tissues<br>Increase, Clonal Expansion of Altered Hepatic Foci<br>Increased, inflammation<br>systemic inflammatory response syndrome                                                                                                                                                                                                                                  | Cognitive Function, Decreased<br>Increased, adenomas (pituitary)<br>Oxidation of membrane lipids<br>Increased, adenosquamous carcinomas of endometrium<br>Increase, Respiratory or Squamous Metaplasia<br>Activation, AKT2<br>Increase, Preneoplastic foci (hepatocytes)<br>Endocytotic lysosomal uptake<br>Apoptosis                                                                                                                                                                                                                                                                                                                                                                                         | Increase, Clonal Expansion of Altered Hepatic Foci<br>Increase cell proliferation<br>Altered, Gene Expression<br>Decrease, Cell proliferation<br>systemic inflammatory response syndrome<br>Increased, recruitment of inflammatory cells<br>Increased, inflammation<br>Altered gene expression, TGF-β dependent fibrosis pathway<br>Osteoporosis and vascular calcification, Bone deterioration<br>Increased, adenomas (pituitary)<br>Promotion, ovarian adenomas<br>Binding to ACE2<br>Inflammatory events in light-exposed tissues<br>Increased Pro-inflammatory mediators<br>systemic inflammation leading to hepatic steatosis<br>Unfolded Protein Response<br>Suppression, Inflammatory cytokines<br>Inhibition, Nuclear factor kappa B (NF-κB) |
| THP1-AO predicted                                                                                                                                                                                                                                                                                                                                                                                                                                                                                                                                                                                                                                                                                                                           | Lung-AO predicted                                                                                                                                                                                                                                                                                                                                                                                                                                                                                                                                                                                                                                                                                             | BEAS-2B-AO predicted                                                                                                                                                                                                                                                                                                                                                                                                                                                                                                                                                                                                                                                                                                                                 |
| Inflammatory events in light-exposed tissues<br>Increased, mesotheliomas<br>N/A, Neurodegeneration<br>Hyperinflammation<br>N/A, Breast Cancer<br>Neural tube defects<br>Cholestasis, Pathology<br>Increase, DNA damage<br>Increase, Mutations<br>Increased, Liver Steatosis<br>N/A, Liver fibrosis<br>Increased, Ductal Hyperplasia<br>Decrease, Lung function<br>Accumulation, Liver lipid                                                                                                                                                                                                                                                                                                                                                 | Increased, adenosquamous carcinomas of endometrium<br>Inflammatory events in light-exposed tissues<br>Cognitive Function, Decreased<br>Increased, adenomas (pituitary)<br>Apoptosis<br>Liver Injury<br>Increased, Liver Steatosis<br>Increase, Site of Contact Nasal Tumors<br>Increased, mesotheliomas<br>Increase, lung cancer<br>N/A, Liver fibrosis<br>N/A, Breast Cancer<br>Accumulation, Liver lipid<br>Occurrence, Kidney toxicity<br>Parkinsonian motor deficits<br>N/A, Neurodegeneration                                                                                                                                                                                                            | Inflammatory events in light-exposed tissues<br>Promotion, ovarian adenomas<br>Increased, adenomas (pituitary)<br>Increase, Increased susceptibility to infection<br>Hyperinflammation<br>Decrease, Growth<br>Orofacial clefting<br>N/A, Breast Cancer<br>Neurodegeneration<br>Neural tube defects<br>Increased, mesotheliomas<br>Apoptosis<br>Immune mediated hepatitis<br>Parkinsonian motor deficits<br>Increase, Mutations<br>N/A, Neurodegeneration<br>Decrease, Lung function<br>Increased, Liver Steatosis<br>Increased Mortality                                                                                                                                                                                                             |
| THP1-MIE predicted                                                                                                                                                                                                                                                                                                                                                                                                                                                                                                                                                                                                                                                                                                                          | Lung-MIE predicted                                                                                                                                                                                                                                                                                                                                                                                                                                                                                                                                                                                                                                                                                            | BEAS-2B-MIE predicted                                                                                                                                                                                                                                                                                                                                                                                                                                                                                                                                                                                                                                                                                                                                |
| systemic inflammation leading to hepatic steatosis<br>ROS generation from photoactivated chemicals<br>Oxidative Stress<br>Frustrated phagocytosis<br>Alkylation, Protein<br>Inhibition, Bile Salt Export Pump (ABCB11)<br>Activation, Glucocorticoid Receptor<br>Activation of Cyp2E1<br>Increase, DNA damage<br>Binding, Thio/seleno-proteins involved in protection against oxidativ<br>Activation, Estrogen receptor<br>Histone deacetylase inhibition<br>Increase in reactive oxygen and nitrogen species (RONS)<br>Inhibition, IKK complex<br>Non-coding RNA expression profile alteration<br>Inhibition, NADH-ubiquinone oxidoreductase (complex I)<br>Thyroid hormone synthesis, Decreased<br>Acetylcholinesterase (AChE) Inhibition | systemic inflammation leading to hepatic steatosis<br>Endocytotic lysosomal uptake<br>ROS generation from photoactivated chemicals<br>Antagonism, Thyroid Receptor<br>Activation, Androgen receptor<br>Mitochondrial impairment<br>narcois<br>Histone deacetylase inhibition<br>Activation, PPARα<br>Increase, Cytotoxicity (hepatocytes)<br>Activation, AhR<br>Direct mitochondrial inhibition<br>Increased, Hepatic thyroid hormone uptake/transport<br>Non-coding RNA expression profile alteration<br>Thyropoxidase, Inhibition<br>Thyroid hormone synthesis, Decreased<br>Increase, DNA damage<br>Acetylcholinesterase (AChE) Inhibition<br>Inhibition, Na+/I- symporter (NIS)<br>Decompartmentalization | systemic inflammation leading to hepatic steatosis<br>Activation, Glucocorticoid Receptor<br>Oxidative Stress<br>Protein Adduct Formation<br>Alkylation, Protein<br>Covalent Binding, Protein<br>Activation, Estrogen receptor<br>Histone deacetylase inhibition<br>CYP2E1 Activation<br>ROS generation from photoactivated chemicals<br>Inhibition of N-linked glycosylation<br>Frustrated phagocytosis<br>Activation of Cyp2E1<br>Increase, DNA damage<br>Inhibition, IKK complex<br>Increase in reactive oxygen and nitrogen species (RONS)                                                                                                                                                                                                       |

Table S2: Events enriched from the dataset GSE127773

| Event      | Padj                 | Description                             |
|------------|----------------------|-----------------------------------------|
| Event 1512 | 5.09776232953353e-14 | Unfolded Protein Response               |
| Event:1825 | 6.19156257981582e-14 | Increase, Cell death                    |
| Event:403  | 1.52814019037611e-13 | Suppression, Immune system              |
| Event:1817 | 2.44960766999024e-13 | Apoptotic cell death                    |
| Event:1505 | 4.312678909358e-13   | Cell cycle, disrupted                   |
| Event:1912 | 1.50327417433568e-12 | Motile Cilia Number/Length, Decreased   |
| Event:1183 | 2.93639390704635e-12 | Decreased, Apoptosis (Epithelial Cells) |

**Table S3:** Results of the clustering of the 93 co-expression networks. Networks belonging to each cluster are reported in the same column.

| Cluster 1         | Cluster 2       | Cluster 3       | Cluster 4       | Cluster 4        |
|-------------------|-----------------|-----------------|-----------------|------------------|
| Beas2b_Tio2r_core | THP1_Tio2s_COOH | Lung_Ag_NH      | THP1_Ag_NH      | Lung_Au20_PEG    |
| Beas2b_Au20_COOH  | THP1_Tio2r_core | Lung_CuO_NH     | THP1_MWCNT_core | Lung_ND_PEG      |
| Beas2b_QD_COOH    | THP1_ND_PEG     | Lung_Tio2r_COOH | THP1_MWCNT_PEG  | Lung_Ag_PEG      |
| Beas2b_ND_NH      | THP1_ND_COOH    | Lung_Tio2r_core | THP1_ND_NH      | Lung_Tio2s_PEG   |
| Beas2b_Au5_NH     | THP1_Tio2s_NH   | Lung_CuO_COOH   | THP1_Ag_COOH    | Lung_ND_NH       |
| Beas2b_CuO_COOH   | THP1_Tio2s_core | Lung_CdTe_PEG   | THP1_QD_NH      | Lung_Au5_PEG     |
| Beas2b_Ag_NH      | THP1_CuO_PEG    | Lung_CdTe_COOH  | THP1_QD_PEG     | Lung_Au5_COOH    |
| Beas2b_MWCNT_COOH | THP1_Tio2r_NH   | Beas2b_ND_PEG   | THP1_Au5_NH     | Lung_Tio2s_NH    |
| Beas2b_Ag_COOH    | THP1_Tio2r_PEG  | Lung_CdTe_NH    | THP1_CuO_COOH   | Lung_Tio2s_COOH  |
| Beas2b_Au5_COOH   | THP1_Tio2r_COOH | Lung_MWCNT_COOH | THP1_Au5_COOH   | THP1_Tio2s_PEG   |
| Beas2b_CuO_PEG    |                 | Lung_MWCNT_NH   | THP1_Au20_NH    | Beas2b_Tio2s_PEG |
| Beas2b_Au20_PEG   |                 | Lung_CuO_core   | THP1_MWCNT_COOH | Lung_Au20_NH     |
| Beas2b_MWCNT_core |                 | Lung_Tio2s_core | THP1_CuO_NH     | Lung_ND_COOH     |
| Beas2b_QD_PEG     |                 | Lung_Ag_COOH    | THP1_Ag_PEG     | Lung_Au20_COOH   |
| Beas2b_Tio2s_NH   |                 | Lung_CuO_PEG    | THP1_MWCNT_NH   | Lung_Tio2r_PEG   |
| Beas2b_CuO_NH     |                 | Lung_MWCNT_core | THP1_Au20_PEG   | Lung_Au5_NH      |
| Beas2b_Ag_PEG     |                 | Lung_MWCNT_PEG  | THP1_Au20_COOH  |                  |
| Beas2b_CuO_core   |                 | Lung_Tio2r_NH   | THP1_CuO_core   |                  |
| Beas2b_Au5_PEG    |                 |                 | THP1_Au5_PEG    |                  |
| Beas2b_Tio2r_COOH |                 |                 | THP1_QD_COOH    |                  |
| Beas2b_Tio2s_core |                 |                 |                 |                  |
| Beas2b_MWCNT_PEG  |                 |                 |                 |                  |
| Beas2b_Tio2r_PEG  |                 |                 |                 |                  |
| Beas2b_MWCNT_NH   |                 |                 |                 |                  |
| Beas2b_Tio2r_NH   |                 |                 |                 |                  |
| Beas2b_QD_NH      |                 |                 |                 |                  |
| Beas2b_ND_COOH    |                 |                 |                 |                  |
| Beas2b_Au20_NH    |                 |                 |                 |                  |
| Beas2b_Tio2s_COOH |                 |                 |                 |                  |
